# Supplementary material for: In vivo evaluation of a pro-healing polydopamine coated stent through an in-stent restenosis rat model
Source: Royal Society of Chemistry journal article supplement (doi:10.1039/d0bm01204a), 2020-10-22
Supplement: d0bm01204a1.pdf [file d0bm01204a1.pdf]

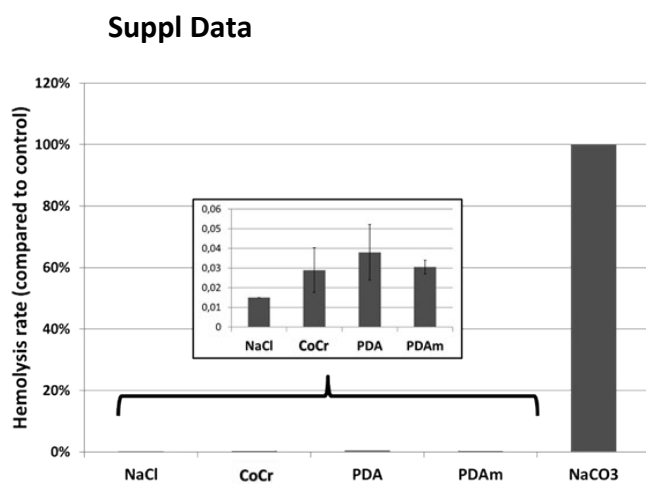

Figure S1: Hemolysis test showed no different hemolysis between the negative control (NaCl) and the different samples, when compared to full hemolysis of the sample (NaCO3).
